# Supplementary material for: Poly-γ-glutamic acid/melanin-like hydrogel as an efficient UVA protection and antioxidative enhancer for preventing and treating UVA-induced skin damage
Source: Royal Society of Chemistry journal article supplement (doi:10.1039/d4nj03633f), 2024-01-01
Supplement: d4nj03633f1.pdf [file d4nj03633f1.pdf]

# Poly- $\gamma$ -glutamic Acid/Melanin-like Hydrogel as Efficient UVA Protection and Antioxidative Enhancers for Preventing and Treating UVA- Induced Skin Damage

*Zhuangzhuang Niu,<sup>a, c</sup> Pengqi Zhu,<sup>a, b, \*</sup> Gang Li,<sup>c</sup> Caifang Gao,<sup>a, b</sup> Yuqin Liu,<sup>c</sup> Xiaoli Liu,<sup>c</sup> Jinghua Sun,<sup>a, d</sup> and Ruiping Zhang<sup>e</sup>*

<sup>a</sup>Shanxi Bethune Hospital, Shanxi Academy of Medical Sciences, Tongji Shanxi Hospital, Third Hospital of Shanxi Medical University, Taiyuan 030032, China.

<sup>b</sup>Tongji Hospital, Tongji Medical College, Huazhong University of Science and Technology, Wuhan 430030, China.

<sup>c</sup>Shanxi Medical University, Taiyuan 030001, China.

<sup>d</sup>First Hospital of Shanxi Medical University, Taiyuan, 030001, China.

<sup>e</sup>The Radiology Department of Shanxi Provincial People's Hospital, Fifth Hospital of Shanxi Medical University, Taiyuan, 030001, China.

\*Corresponding Author

E-mail: zhupengqi15@163.com (Associate Prof. P. Zhu).

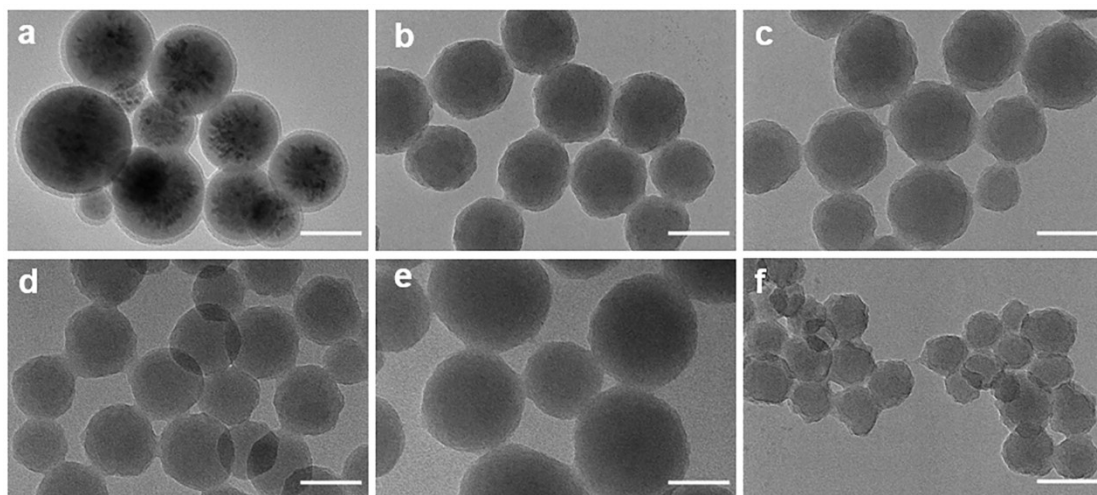

**Figure S1.** TEM images of a) PDA NPs, b) PDA-L-1, c) PDA-L-2, d) PDA-L-4, e) PDA-L-5 and f) PDA-L-6. Scale bars, 100 nm.

**Table S1.** PDA-L-i (i = 1-6) with different nitrogen contents and doped L-lysine contents.

| Entry | Material | N/%  | L-lysine/% |
|-------|----------|------|------------|
| 1     | PDA      | 8.08 | 0          |
| 2     | PDA-L-1  | 8.13 | 0.45       |
| 3     | PDA-L-2  | 8.33 | 2.3        |
| 4     | PDA-L-3  | 8.44 | 3.24       |
| 5     | PDA-L-4  | 8.62 | 4.86       |
| 6     | PDA-L-5  | 8.9  | 7.38       |
| 7     | PDA-L-6  | 9.24 | 10.25      |

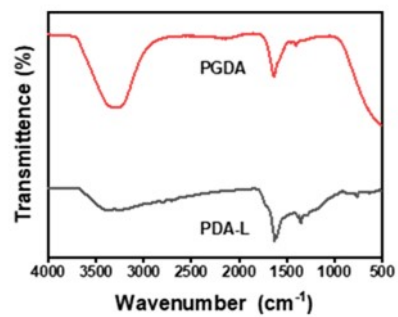

**Figure S2.** IR spectra of PDA-L and PGDA.

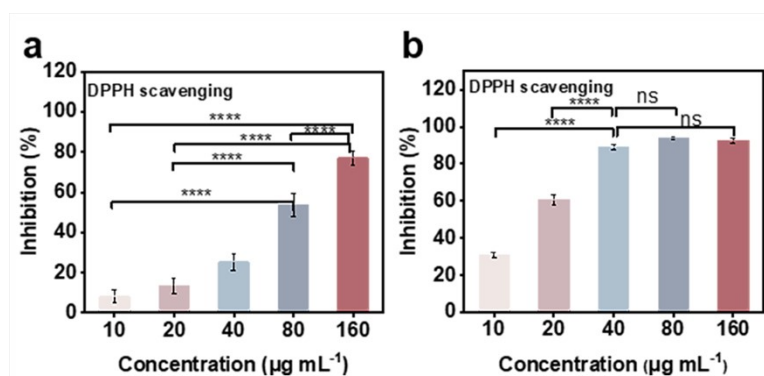

**Figure S3.** DPPH free-radical scavenging ability of different concentrations of a) PDA and b) PDA-L. Data are shown as mean  $\pm$  s.d. ( $n = 3$ ), \* $P < 0.05$ , \*\* $P < 0.01$ , \*\*\* $P < 0.001$ , \*\*\*\* $P < 0.0001$ , ns = not significant.

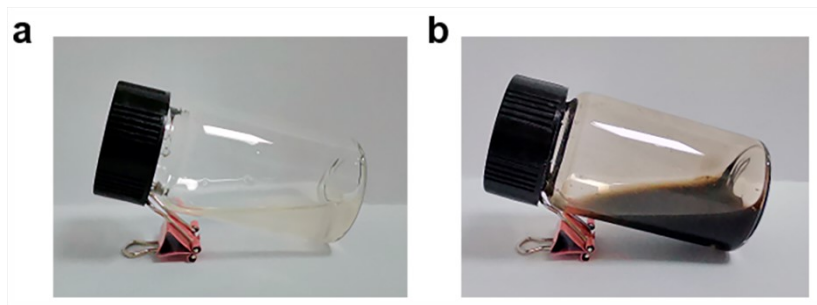

**Figure S4.** Photographs of a) the hydrogel matrix SPE and b) the sunscreen hydrogel PGDA.

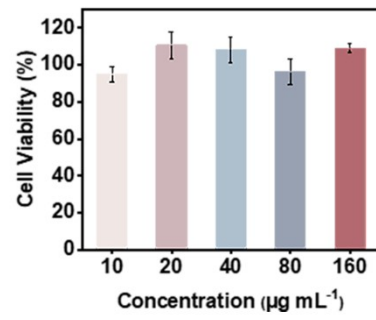

**Figure S5.** Effect of PGDA on the cell viability of L929 cell line at increasing concentration following 24 h of incubation.

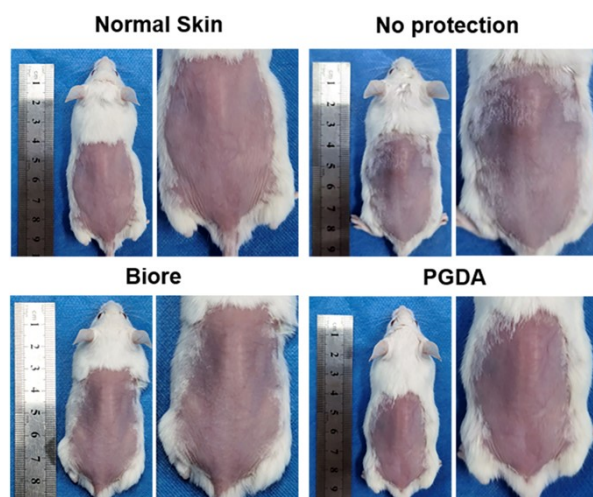

**Figure S6.** Photographs of the dorsal skin of mice in different groups after UV irradiation.

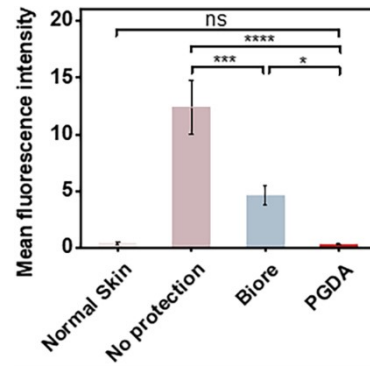

**Figure S7.** The average fluorescence intensity of skin tissue damaged by different treatment methods was quantitatively analyzed. Data are shown as mean  $\pm$  s.d. (n = 3), \*P < 0.05, \*\*P < 0.01, \*\*\*P < 0.001, \*\*\*\*P < 0.0001, ns = not significant.
